# Supplementary material for: Effects of the addition of CeO2 on the steam reforming of ethanol using novel carbon-Al2O3 and carbon-ZrO2 composite-supported Co catalysts
Source: Royal Society of Chemistry journal article supplement (doi:10.1039/d1ra00141h), 2021-01-01
Supplement: d1ra00141h1.pdf [file d1ra00141h1.pdf]

Table S1 Change in the inlet pressure with reaction temperature

| Sample name         | Temperature (°C) |      |      |      |
|---------------------|------------------|------|------|------|
|                     | 300              | 400  | 500  | 600  |
| 16Co63C21Al         | 0                | 0.05 | 0.69 | 0.39 |
| 16Co42C21Ce21Al     | 0                | 0    | 0.32 | 0.15 |
| 16Co63C21Zr         | 0                | 0    | 0.80 | 1.86 |
| 16Co42C10.5Ce31.5Zr | 0.03             | 0.08 | 1.18 | 0.68 |
| 16Co42C21Ce21Zr     | 0                | 0    | 0.07 | 0.14 |
| 16Co42C31.5Ce10.5Zr | 0                | 0    | 1.90 | 0.42 |

Values are expressed by the scale of MPa on a gauge.

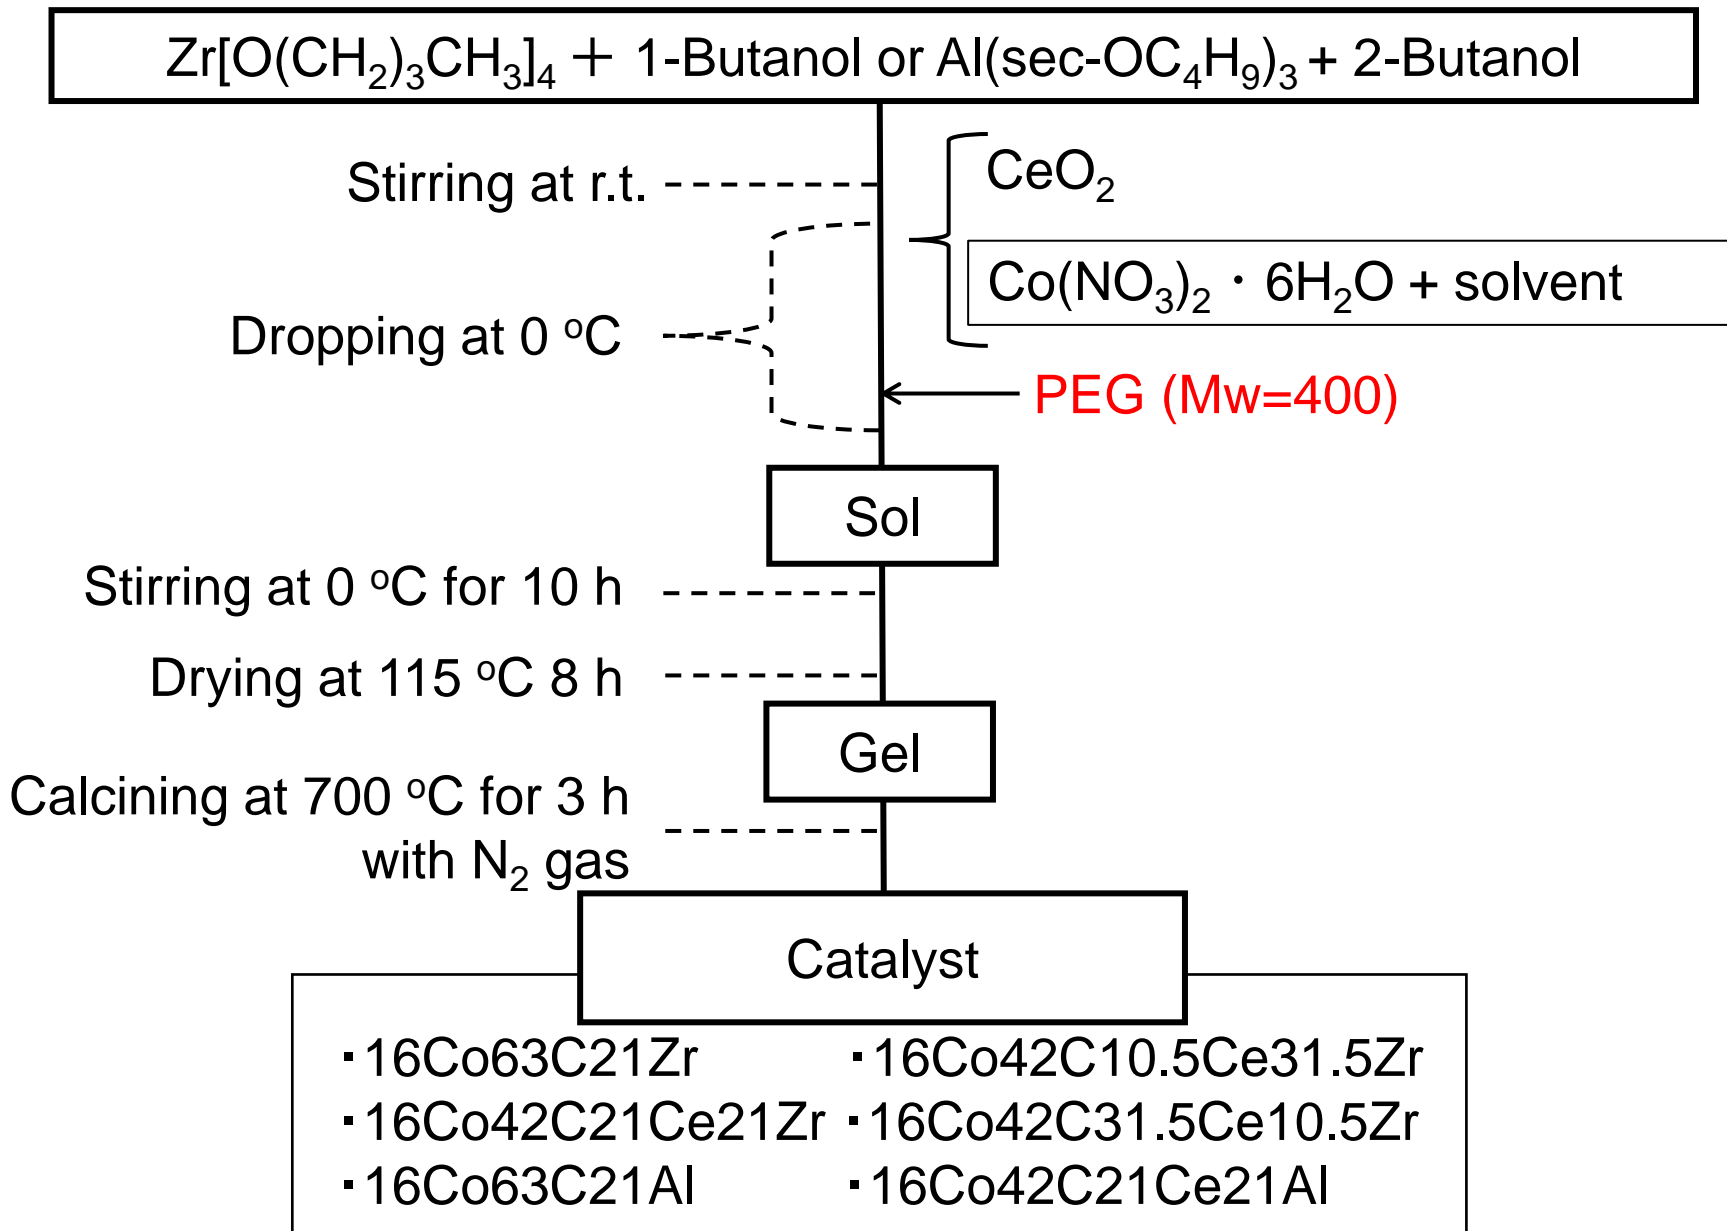

Fig. S1 Flowchart for preparation of catalysts using the sol-gel method.

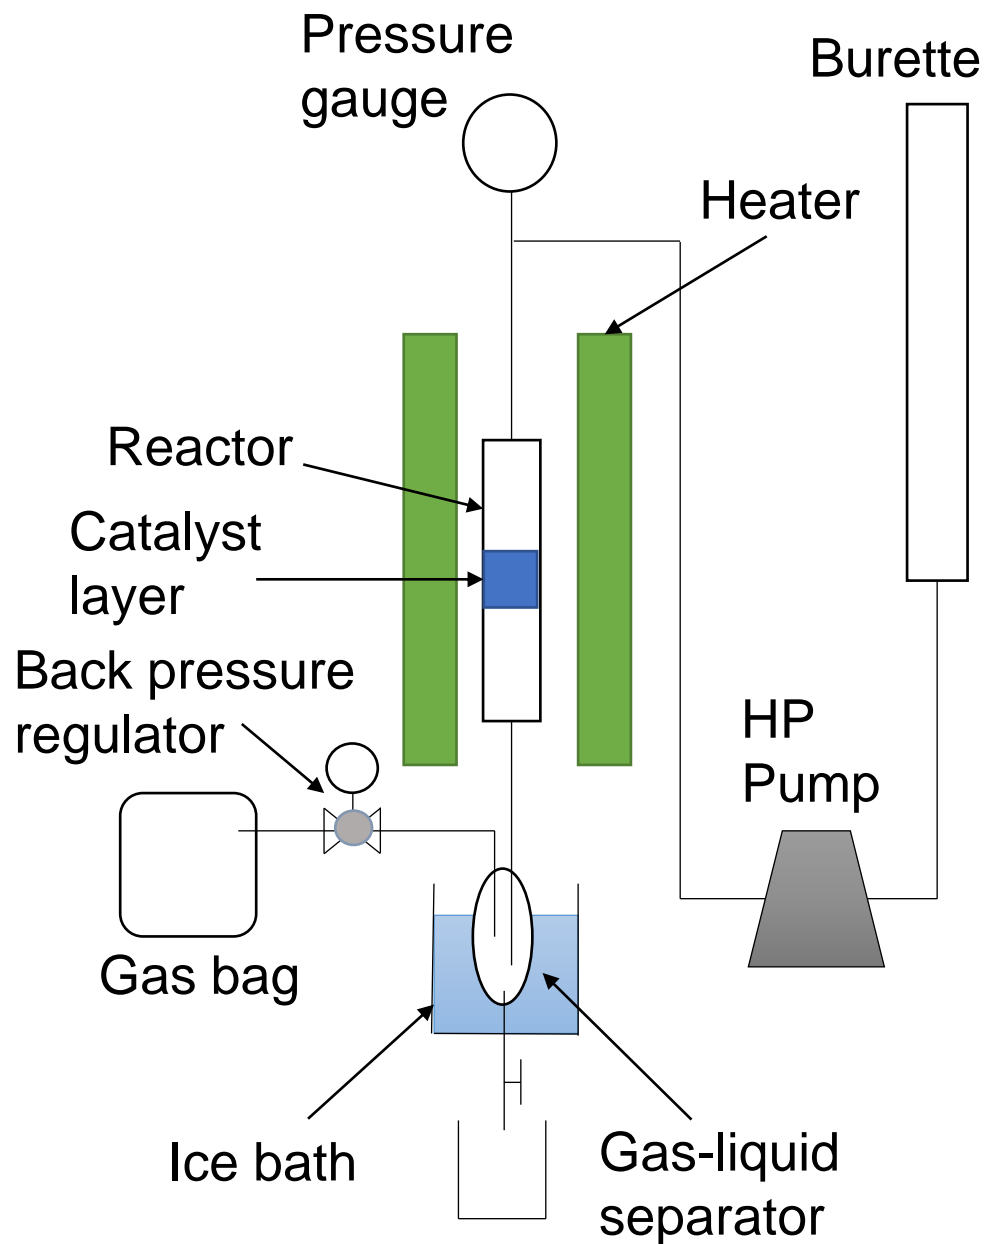

Fig. S2 Reaction apparatus of steam reforming of ethanol.

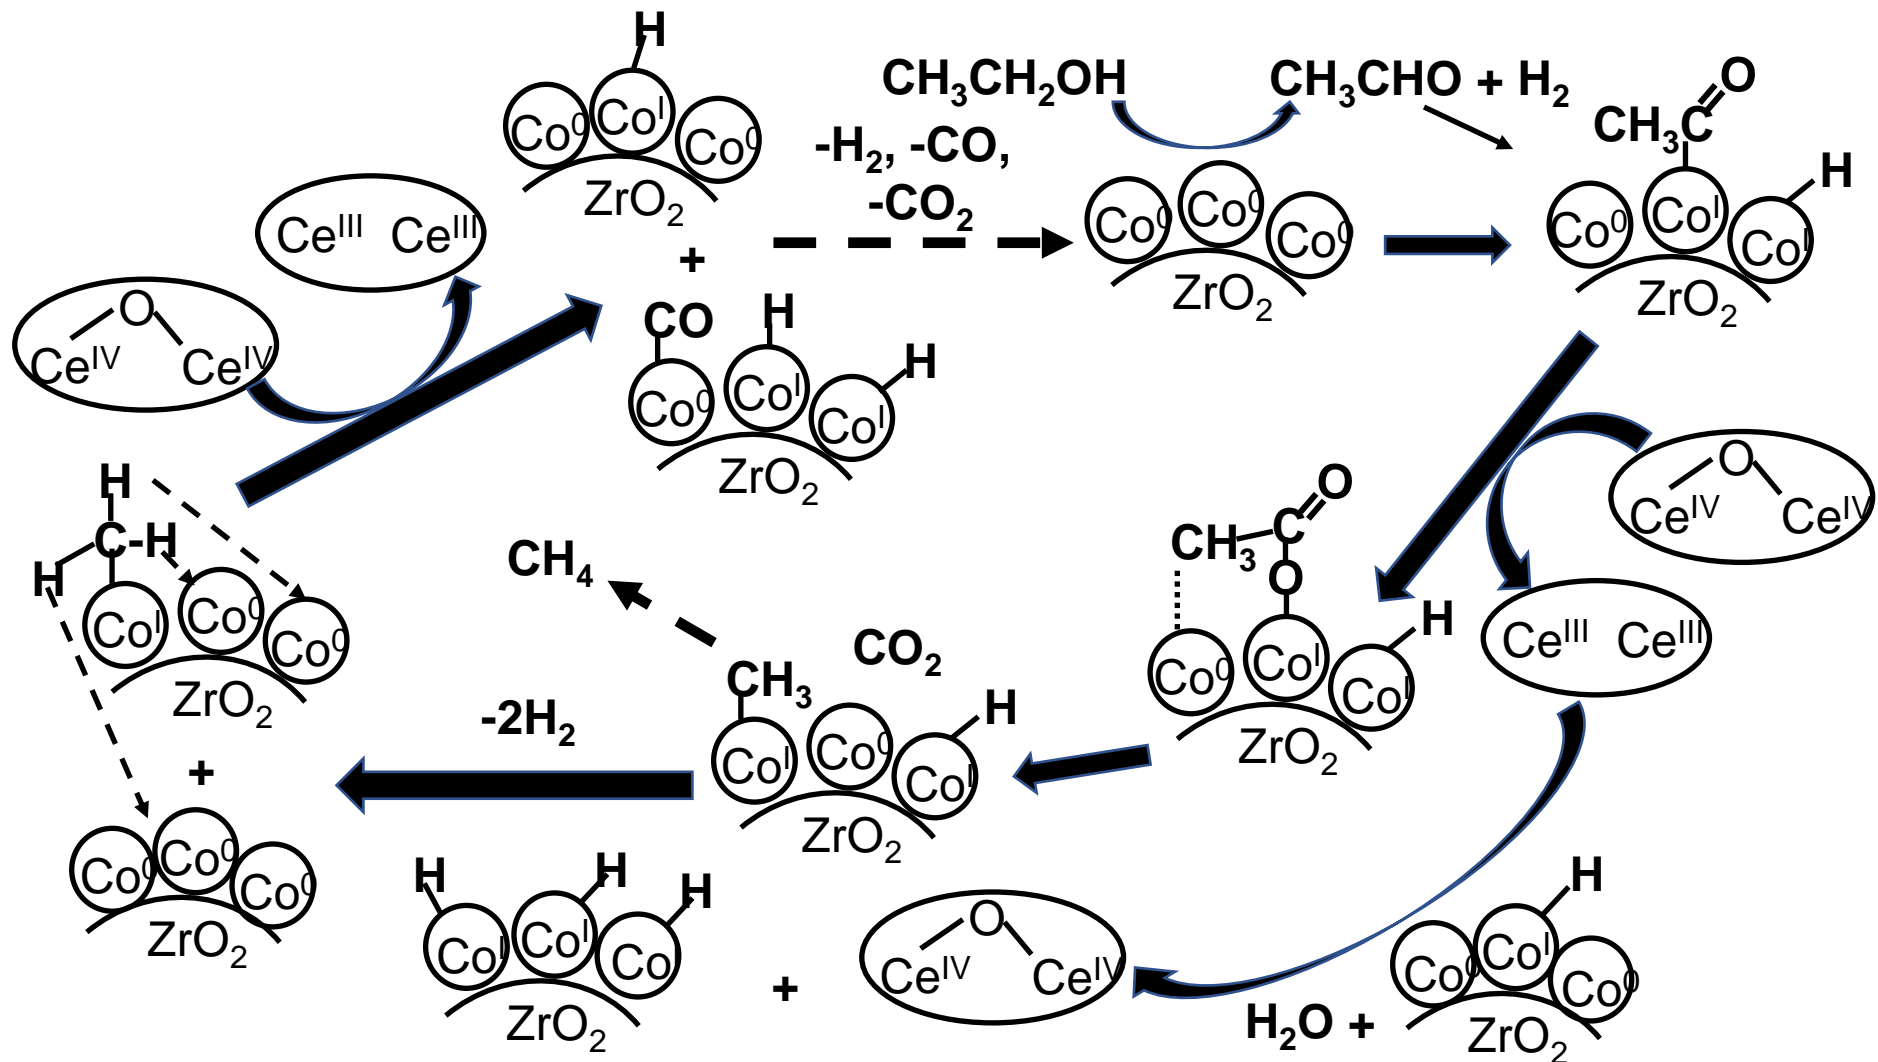

Figure S3 Another possible reaction routes in steam reforming of ethanol catalyzed by Co/CeO<sub>2</sub>-ZrO<sub>2</sub>
